# Supplementary material for: Abiotic Stress Response in Native Grasses and Their Suitability as Garden Plants Under Global Climate Change
Source: Preprints.org preprint supplement (doi:10.20944/preprints202410.1494.v1), 2024-10-18
Supplement: Supplementary file 1 [file supplementary]

**Supplementary Figure**

Abiotic stress response in native grasses and their suitability as garden plants under global climate change

Saeng Geul Baek 1,2, Jung Won Shin 1, Jae Ik Nam 1, Jeong Min Seo 1,Jung Min Kim 1 and Su Young Woo 2,*

1 Gardening material Division, Korea Arboreta and Gardens Institute, Sejong-si 30106, Republic of Korea; [bsg1175@koagi.or.kr](mailto:bsg1175@koagi.or.kr) (S.G.B.); [wony1208@koagi.or.kr](mailto:wony1208@koagi.or.kr) (J.W.S.); [silhouette@koagi.or.kr](mailto:silhouette@koagi.or.kr) (J.I.N.); [jmseo3@koagi.or.kr](mailto:jmseo3@koagi.or.kr) (J.M.S.); [kimini@koagi.or.kr](mailto:kimini@koagi.or.kr) (J.M.K.)

2 Department of Environmental Horticulture, University of Seoul, Seoul 02504, Republic of Korea;

***** Correspondence: [wsy@uos.ac.kr](mailto:wsy@uos.ac.kr) ; Tel.: +82-10-3802-5242 (S.Y.W.)

**
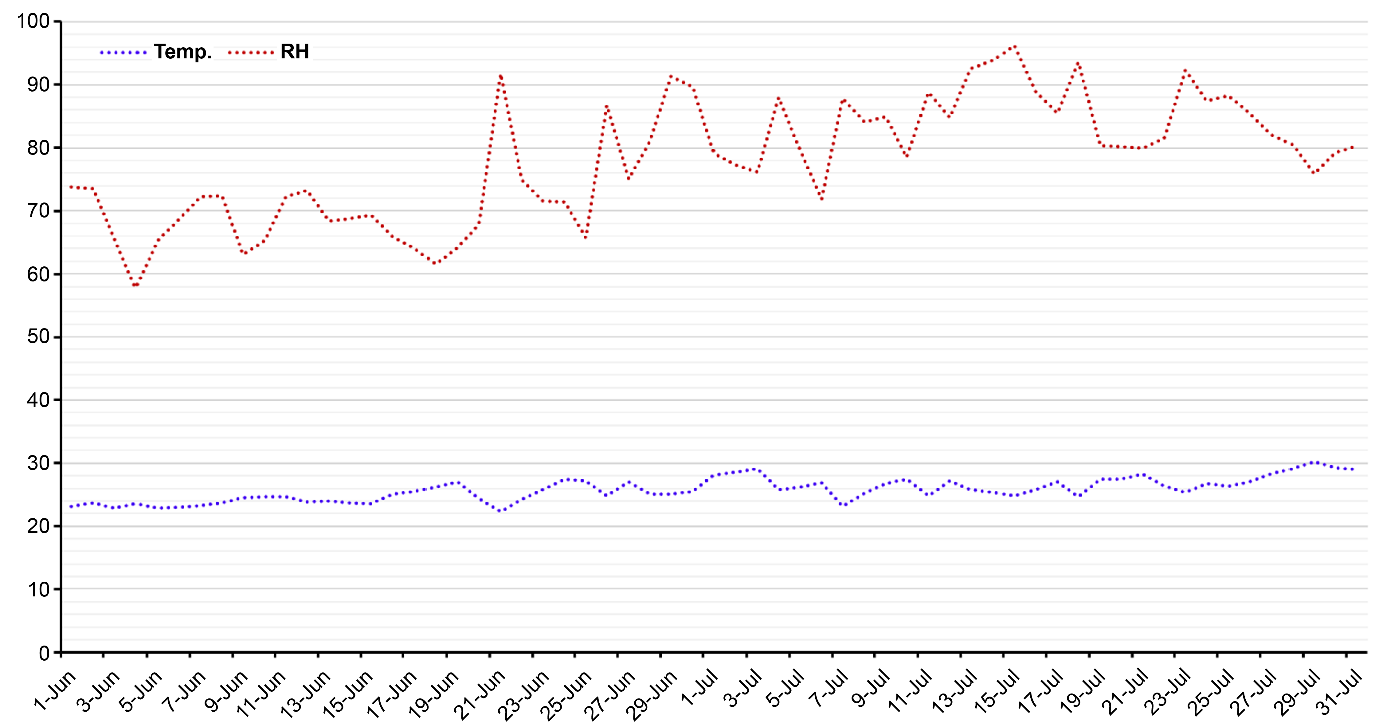
**

**Figure S1.** Change of air temperature and relative humidity in the greenhouse during a month(June~July) of study period. Data were represented as the daily average.
